# Supplementary material for: Morphology tuning of assembled Au–Cu nicotinate rings by ligand coordination and their use as efficient catalysts
Source: Royal Society of Chemistry journal article supplement (doi:10.1039/c6nj03790a), 2016-12-29
Supplement: c6nj03790a1.pdf [file c6nj03790a1.pdf]

## Supporting Information

### Morphology tuning of assembled Au-Cu nicotinate rings by ligand coordination and used as efficient catalyst

Shanshan Fu,<sup>a</sup> Guojuan Ren,<sup>a</sup> Shuang Li,<sup>a</sup> Fang Chai<sup>\*a</sup>, Chungang Wang<sup>\*b</sup> and Fengyu Qu<sup>\*a</sup>

<sup>a</sup> Key Laboratory of Design and Synthesis of Functional Materials and Green Catalysis, Colleges of Heilongjiang Province, College of Chemistry and Chemical Engineering, Harbin Normal University, Harbin 150025, P. R. China. E-mail: fangchai@gmail.com, qufengyuchem@hrbnu.edu.cn

<sup>b</sup> Faculty of Chemistry, Northeast Normal University, Changchun, 130024, P.R. China.

E-mail: wangcg925@nenu.edu.cn

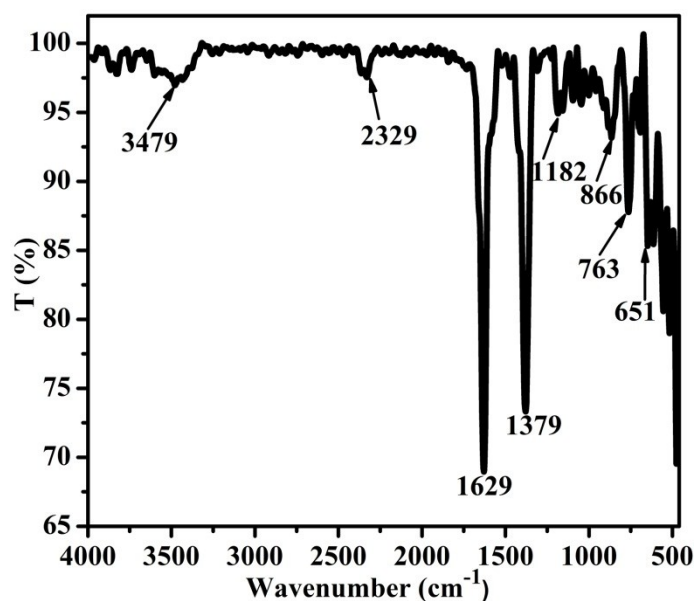

Fig. S1 FTIR spectra of the Au-Cu NRs.

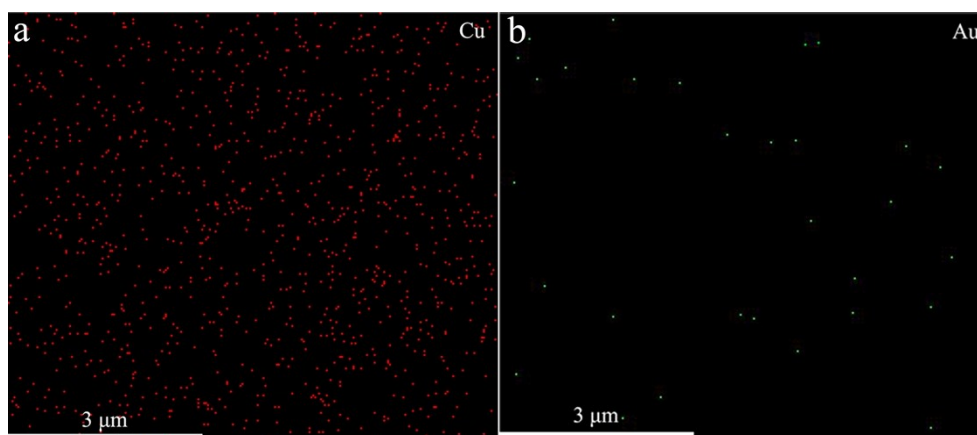

**Fig. S2** SEM-EDS mapping of the Au-Cu NRs, corresponding (e) Cu and (f) Au.

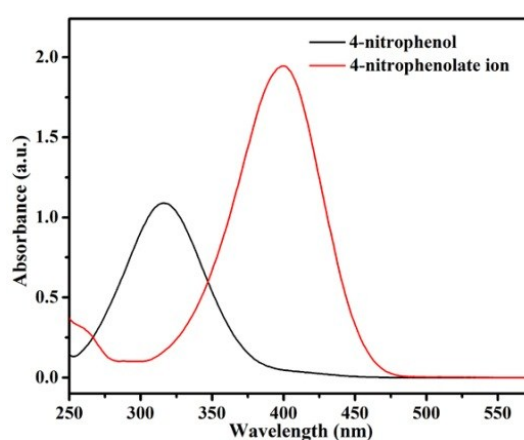

**Fig. S3** The UV-vis characteristic peaks of freshly prepared 4-nitrophenol and 4-nitrophenolate ion aqueous solution at 317 and 400 nm, respectively.

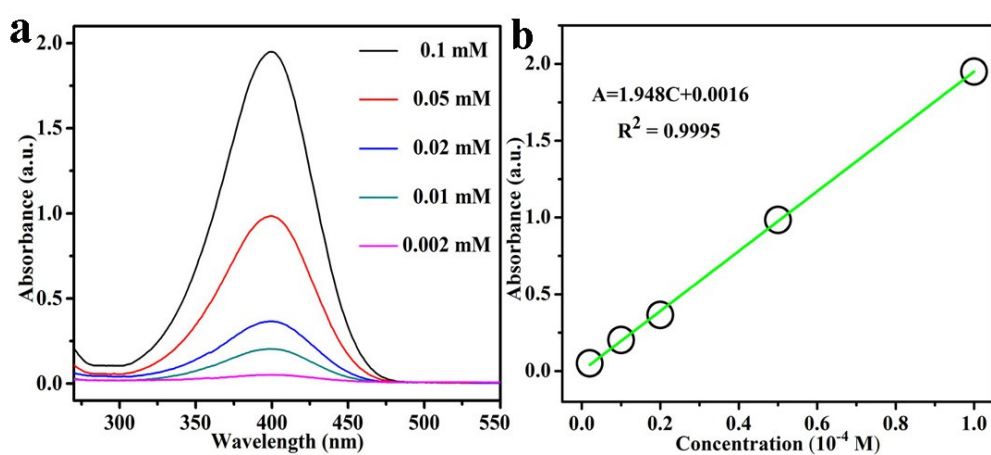

**Fig. S4** (a) Absorption spectra of aqueous mixture solutions of 4-NP and  $\text{NaBH}_4$  at different concentrations of 4-NP. (b) Plot of the peak absorbance against the concentration of 4-NP.

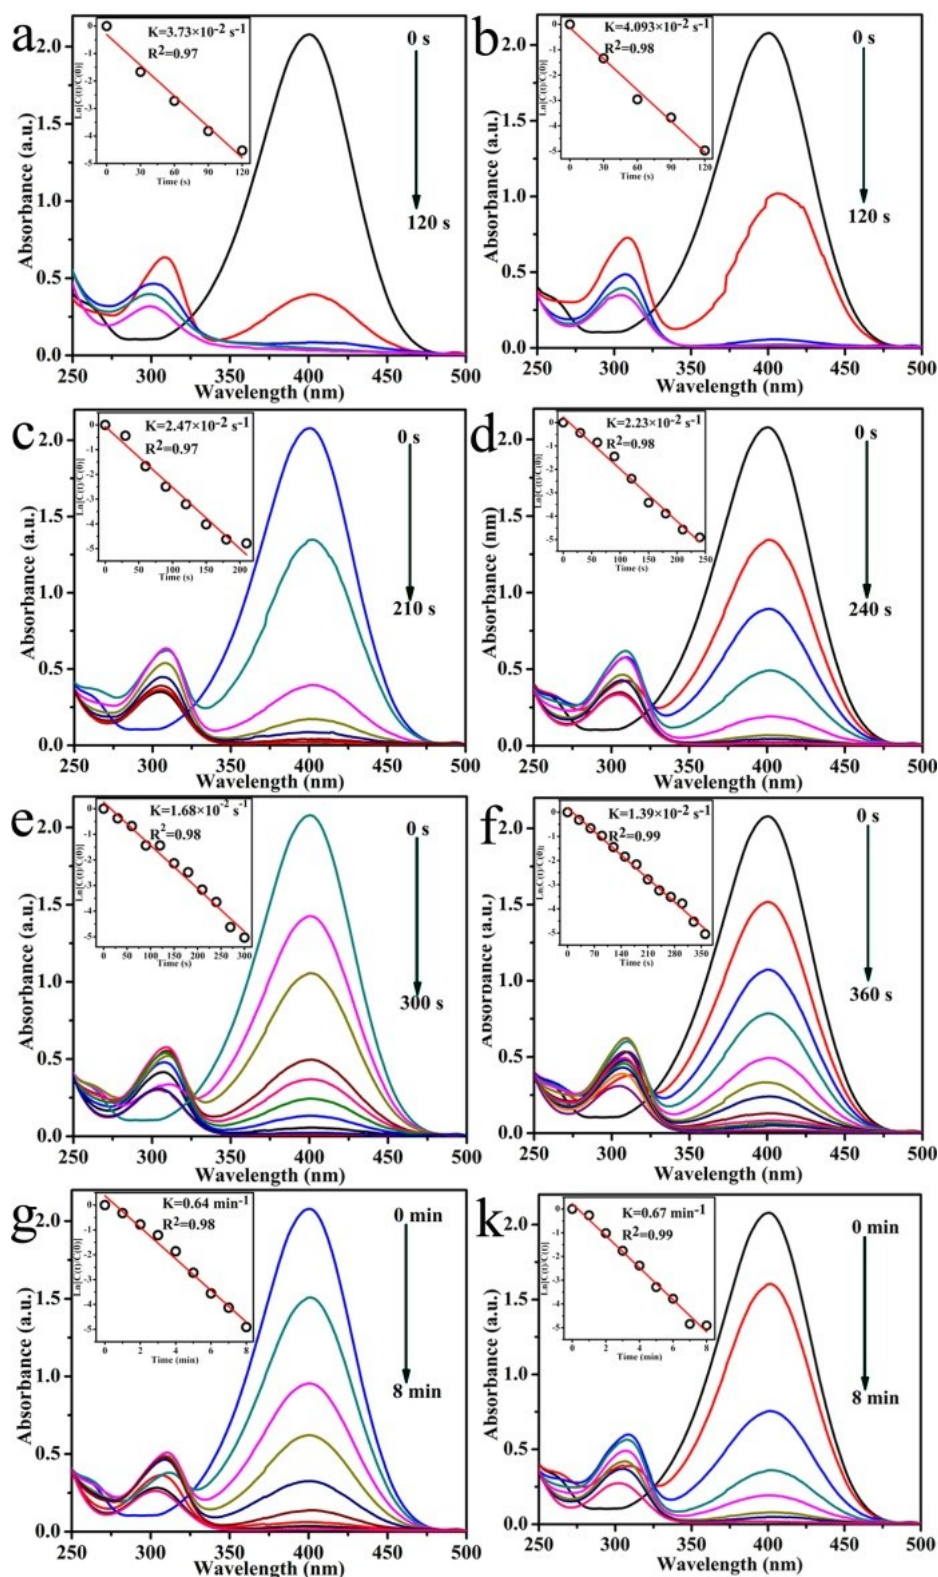

**Fig. S5** UV-vis spectra of the reduction of 4-NP by  $\text{NaBH}_4$  in the presence of Au-Cu NRs (0.2 M nicotinic acid) recorded for the 2<sup>nd</sup> (a), 3<sup>rd</sup> (b), 4<sup>th</sup> (c), 5<sup>th</sup> (d), 6<sup>th</sup> (e), 7<sup>th</sup> (f), 8<sup>th</sup> (g), 9<sup>th</sup> (k), insets: the corresponding  $\ln(C(t)/C(0))$  versus reaction time for reduction of 4-NP.

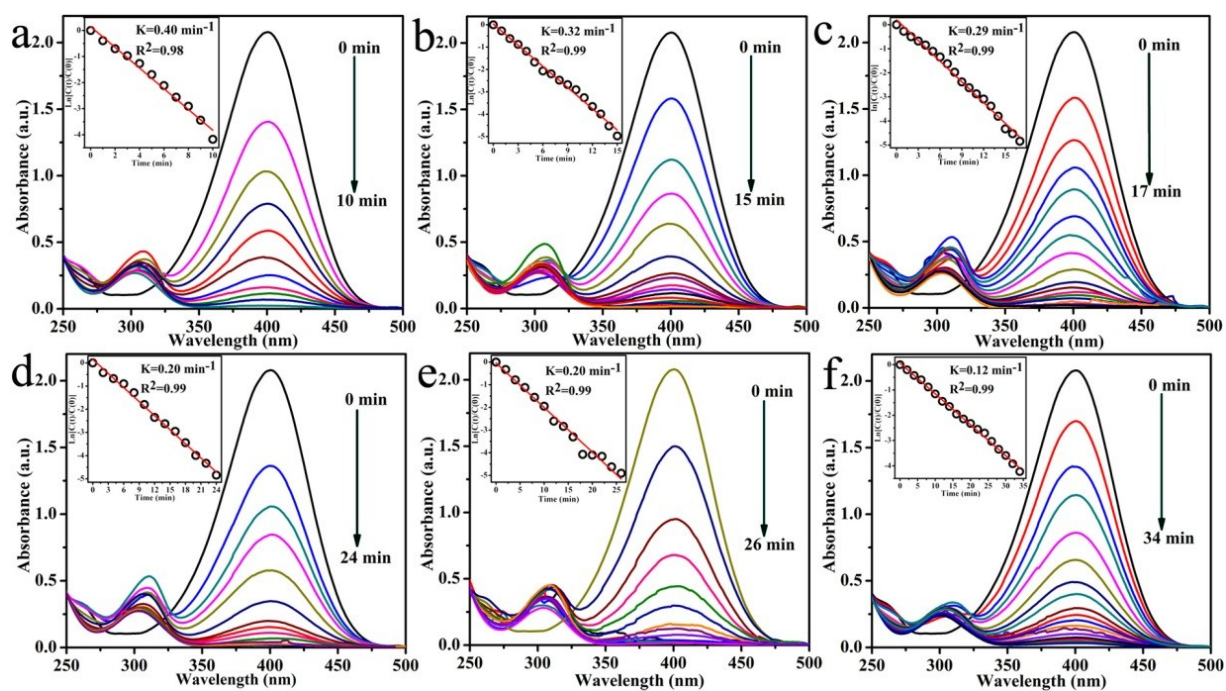

**Fig. S6** UV-vis spectra of the reduction of 4-NP by  $\text{NaBH}_4$  in the presence of Au-Cu NRs (0.2 M nicotinic acid) recorded for the 10<sup>th</sup> (a), 11<sup>th</sup> (b), 12<sup>th</sup> (c), 13<sup>th</sup> (d), 14<sup>th</sup> (e), 15<sup>th</sup> (f), insets: the corresponding  $\ln(C_t/C_{(0)})$  versus reaction time for reduction of 4-NP.

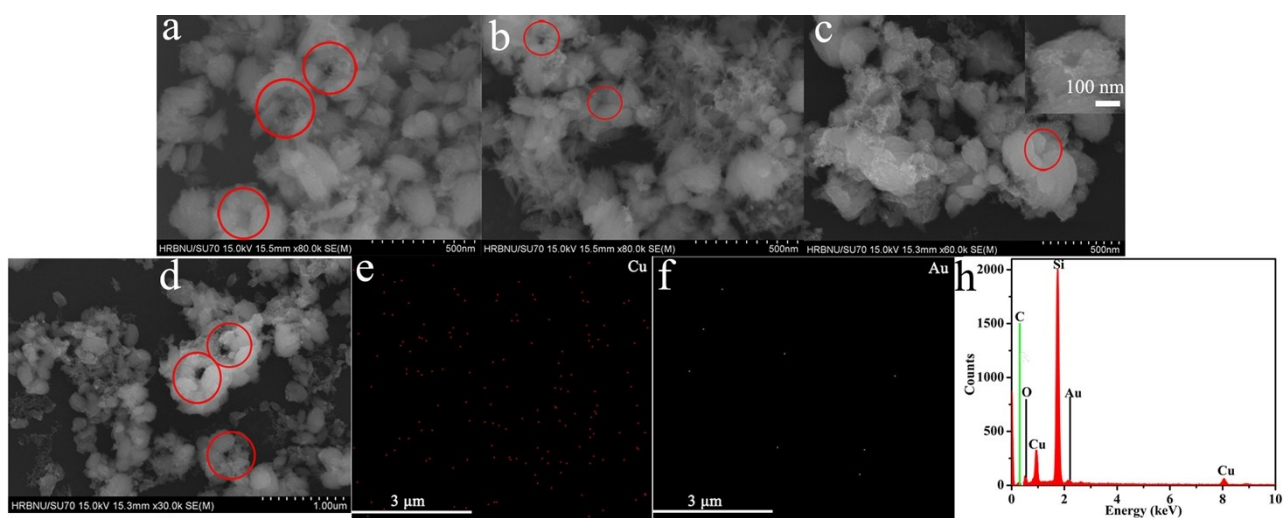

**Fig. S7** The SEM (a, c, b, d) of the Au-Cu NRs as catalyst after reused 3<sup>rd</sup>, 5<sup>th</sup>, 10<sup>th</sup>, 15<sup>th</sup> times, respectively, SEM-EDS mapping of (e) Cu and (f) Au after the Au-Cu NRs as catalyst, (h) EDS of the Au-Cu NRs as catalyst after reused 15<sup>th</sup> times.

In order to validate the possible mechanism we deduced, according to the suggestion, we supplied the XPS data of the formation the samples before the addition of 4-NP (in the process of III). The XPS data of the Au-Cu NRs were obtained by pretreatment as follows: adding 200  $\mu$ L of fresh  $\text{NaBH}_4$  solution after the Au-Cu NRs dispersed in to deionized water (1 mg/mL) without any stirring and ultrasonic dispersion, then the Au-Cu NRs was separated from the solution by centrifugation and dried in oven.

The full-scan XPS spectrum for the Au-Cu NRs after adding the reduce agent  $\text{NaBH}_4$  was illustrated in Fig. S8. Peaks corresponding to C and O can be clearly observed which were located at 284.6, 399.5 and 529.25 eV, corresponding to C 1s, N 1s and O 1s, respectively. The Au4f high resolution spectra represent the XPS signature of the  $4f_{7/2}$  and  $4f_{5/2}$  peaks, separately located at 83.65 and 87.25 eV. The main Cu 2p XPS peaks were observed at 933.25 eV (Cu  $2p_{3/2}$ ) and 953.2 eV (Cu  $2p_{1/2}$ ) can be observed in Fig. S7. Compared with the as-prepared Au-Cu NRs, the XPS data of sample treated by  $\text{NaBH}_4$  occurred displacement in all atom. The Cu 2p XPS spectrum of sample showed shakeup satellite peaks of the Cu  $2p_{3/2}$  at 943.1 and Cu  $2p_{1/2}$  at 962.3 eV, which conformed the presence of Cu(II) and Cu (I) species. The raw areas of the shakeup satellite peaks were grew up due to the adding  $\text{NaBH}_4$  compared with the before and after catalysis (Fig. 2 and Fig. S9). This result proved that the change of the state from the  $\text{Cu}^{2+}$  to  $\text{Cu}^+$  by reduced was existed in the catalysis. It is seemed that the state of the Au4f have no obvious transformation due to the content of Au in the Au-Cu NRs was much less. The solution of  $\text{NaBH}_4$  can only get in touch with the surface of Au-Cu NRs, so, the  $\text{Au}^{3+}$  and  $\text{Cu}^{2+}$  on the surface of Au-Cu NRs can be reduced to  $\text{Au}^{2+}$  and  $\text{Cu}^+$ , respectively. Generally, the characteristic shakeup satellite is peculiar to the Cu(II) species, which relates to d9 configuration of Cu. Thus, the XPS of the Au-Cu NRs indicated that the Au and Cu were still existed mixed valence state.

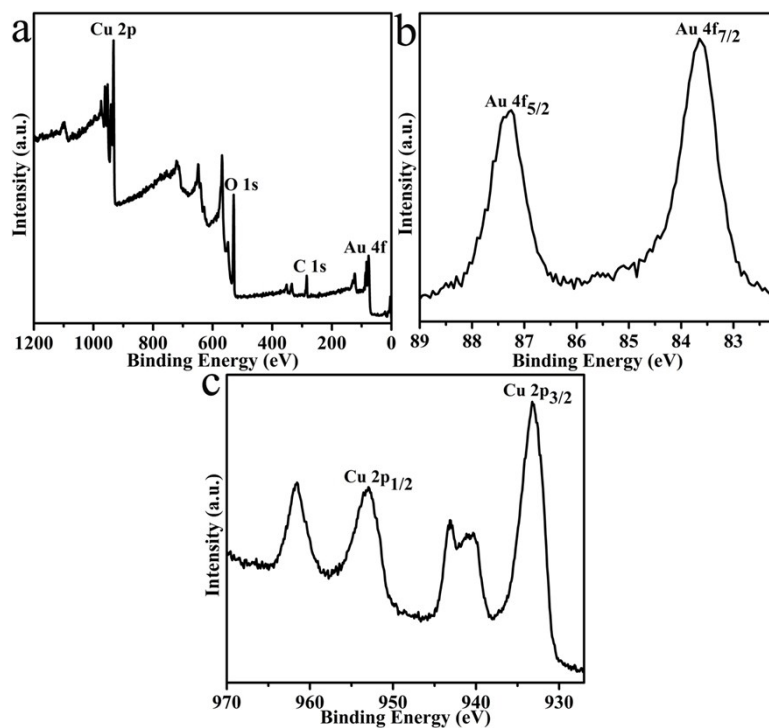

**Fig. S8** (a) XPS spectrum of Au-Cu NRs (0.20 M nicotinic acid) as catalyst before the addition of 4-NP, (b) Au 4f high-resolution XPS spectrum, and (c) Cu 2p peak.

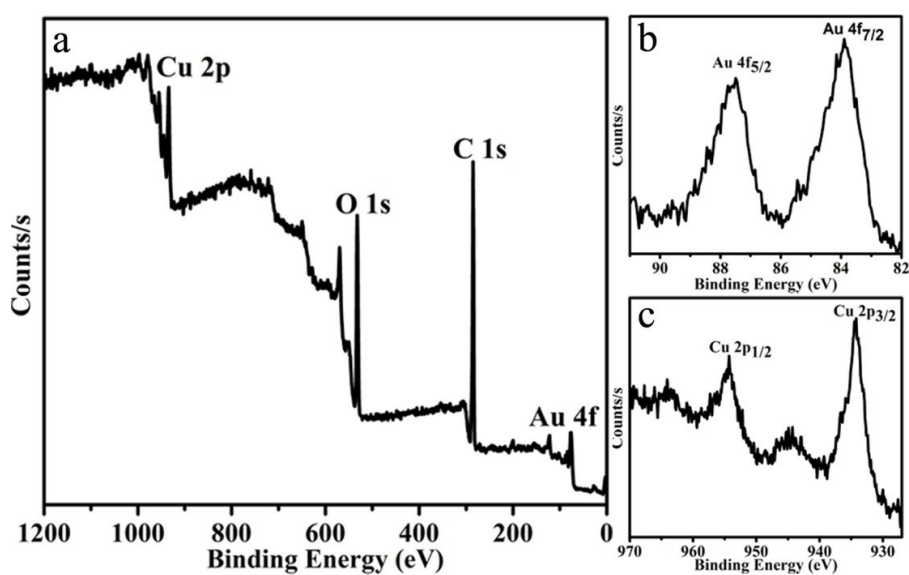

**Fig. S9** (a) XPS spectrum of Au-Cu NRs (0.20 M nicotinic acid) as catalyst after reused 15<sup>th</sup> times, (b) Au 4f high-resolution XPS spectrum, and (c) Cu 2p peak.

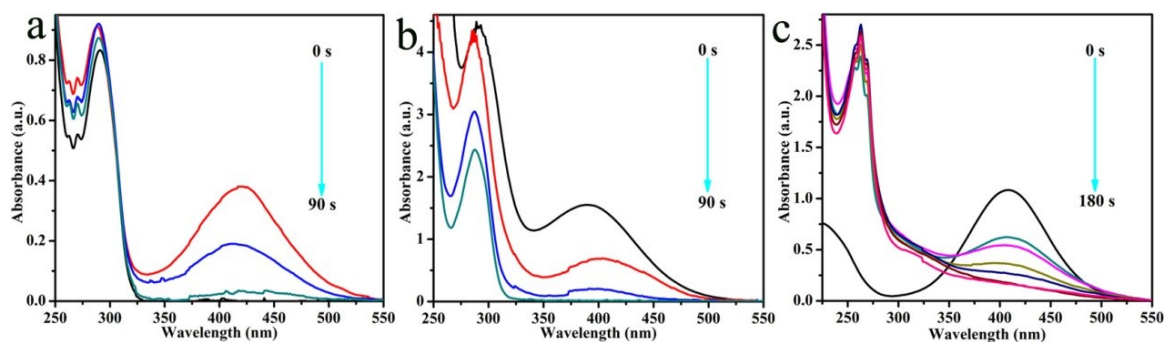

**Fig. S10** UV-vis spectra of the reduction of (a) 2-NP, (b) 3-NP and (c) 4-NTP by NaBH<sub>4</sub> in the presence of Au-Cu NRs.

**Table S1** Elemental analysis of Au-Cu NRs.

| Element Name | Cu   | Au   | N     | C       | H      |
|--------------|------|------|-------|---------|--------|
| Content (%)  | 1.65 | 0.28 | 8.802 | 45.7588 | 2.1465 |

**Table S2** The reduction of 4-NP in the presence of varying amount of Au-Cu NRs catalysts

| Catalyst                                                               | Type           | Concentration of 4-NP         | Amount of catalyst                    | TOF <sup>a</sup>                     | References |
|------------------------------------------------------------------------|----------------|-------------------------------|---------------------------------------|--------------------------------------|------------|
| Au-Cu NRs                                                              | Nanosheets     | 0.01 M, 30 $\mu$ L            | 0.025 mg                              | $2.17 \times 10^{-2} \text{ s}^{-1}$ | This work  |
| TiO <sub>2</sub> /0.1 mol% Au                                          | Supported      | 0.1 M, 30 $\mu$ L             | 2 mg                                  | 84 min <sup>-1</sup>                 | 1          |
| Au@RMF NSs                                                             | Nanostructures | 17 mL, $2.0 \times 10^{-4}$ M | 0.2 mg                                | 279.2 s <sup>-1</sup>                | 2          |
| yolk-like SiO <sub>2</sub> @Fe <sub>3</sub> O <sub>4</sub> /C@Au       | Microspheres   | 0.1 mL, $5 \times 10^{-3}$ M  | 0.05 mg                               | 17.4 min <sup>-1</sup>               | 3          |
| Fe <sub>3</sub> O <sub>4</sub> @SiO <sub>2</sub> -Au@mSiO <sub>2</sub> | Microspheres   | 0.10 mL, 0.005 M              | 3 mg                                  | 0.1 min <sup>-1</sup>                | 4          |
| AuNPs                                                                  | Nano           | 0.30 mM                       | 0.0286 mg/mL                          | 260 h <sup>-1</sup>                  | 5          |
| Au NPs@CNs                                                             | nanocrystal    | 50 mL, 0.12 mM                | 1 mL, total Au content: 0.2 $\mu$ mol | 109 h <sup>-1</sup>                  | 6          |
| Pd@Au CSNTPs                                                           | core-shell     | 2 mL, $1.0 \times 10^{-5}$ M  | 0.005 mg                              | $2.46 \times 10^{-2} \text{ s}^{-1}$ | 7          |

<sup>a</sup> The TOF is defined as the moles of reduced 4-NP molecules per mole of the surface noble metal atoms per second.

Reference:

- 1 Z. Jin, M. D. Xiao, Z. H. Bao, P. Wang and J. F. Wang, *Angew. Chem. Int. Ed.*, 2012, **51**, 6406–6410.
- 2 S. P. Wang, J. A. Zhang, P. F. Yuan, Q. Sun, Y. Jia, W. F. Yan, Z. M. Chen and Q. Xu, *J. Mater. Sci.*, 2015, **50**, 1323–1332
- 3 T. Zeng, X. L. Zhang, S. H. Wang, Y. R. Ma, H. Y. Niu and Y. Q. Cai, *J. Mater. Chem. A*, 2013, **1** 11641–11647.
- 4 Y. H. Deng, Y. Cai, Z. K. Sun, J. Liu, C. Liu, J. Wei, W. Li, C. Liu, Y. Wang and D. Y. Zhao, *J. Am. Chem. Soc.*, 2010, **132**, 8466.
- 5 M. Y. Chen, H. L. Kang, Y. M. Gong, J. Guo, H. Zhang and R. G. Liu, *ACS Appl. Mater. Interfaces*, 2015, **7**, 21717–21726.
- 6 X. D. Wu, C. H. Lu, Z. H. Zhou, G. P. Yuan, R. Xiong and X. X. Zhang, *Environ. Sci.: Nano*, 2014, **1**, 71.
- 7 R. P. Zhao, M. X. Gong, H. M. Zhu, Y. Chen, Y. W. Tang and T. H. Lu, *Nanoscale*, 2014, **6**, 9273–9278.
